# Supplementary material for: Crystal-to-Crystal Transformation from K2[Co(C2O4)2(H2O)2]·4H2O to K2[Co(μ-C2O4)(C2O4)]
Source: MDPI journal article supplement (doi:10.3390/magnetochemistry7060077), 2021-05-28
Supplement: s1 [file s1]

Archive with 1 entries (1 files):
- magnetochemistry-1220836-supplementary.pdf
