# Supplementary material for: Crystal-to-Crystal Transformation from K2[Co(C2O4)2(H2O)2]·4H2O to K2[Co(μ-C2O4)(C2O4)]
Source: MDPI journal article supplement (doi:10.3390/magnetochemistry7060077), 2021-05-28
Supplement: s1 [file s1 › magnetochemistry-1220836-supplementary.pdf]

# Supplementary material: Crystal-to-Crystal Transformation from $\text{K}_2[\text{Co}(\text{C}_2\text{O}_4)_2(\text{H}_2\text{O})_2] \cdot 4\text{H}_2\text{O}$ to $\text{K}_2[\text{Co}(\mu\text{-C}_2\text{O}_4)(\text{C}_2\text{O}_4)]$

Bin Zhang <sup>1,\*</sup>, Yan Zhang <sup>2</sup>, Guangcai Chang <sup>3</sup>, Zheming Wang <sup>4</sup> and Daoben Zhu <sup>1</sup>

<sup>1</sup> Organic Solid Laboratory, BNLM, CMS & Institute of Chemistry, Chinese Academy of Sciences, Beijing 100190, China; zhudb@iccas.ac.cn

<sup>2</sup> Department of Physics, Institute of Condensed Matter and Material Physics, Peking University, Beijing 100871, China; zhang\_yan@pku.edu.cn

<sup>3</sup> BSRF, Institute of High Energy Physics, Chinese Academy of Sciences, Beijing 100047, China; changgc@ihep.ac.cn

<sup>4</sup> State Key Laboratory of Rare Earth Materials Chemistry and Applications, BNLM, College of Chemistry and Molecular Engineering, Peking University, Beijing 100871, China; zmw@pku.edu.cn

\* Correspondence: zhangbin@iccas.ac.cn

## Content

Sample Preparation and Characterization S2

Figure S1. IR spectra of **1** and **2**. S3

Figure S2. Powder X-ray diffraction patterns of **1** and **2**. Blue one is dehydrated sample exposure to air for hours. S4

### Sample Preparation

**1:** 300 mg  $\text{Co}(\text{NO}_3)_2 \cdot 6\text{H}_2\text{O}$ , 740 mg  $\text{K}_2\text{C}_2\text{O}_4 \cdot \text{H}_2\text{O}$  were dissolved in 5 mL  $\text{H}_2\text{O}$  at  $70^\circ\text{C}$ . The small orange crystal was obtained on the bottom of baker after three days with yield of 60%. Elemental analysis calcd (%) for  $\text{C}_4\text{H}_{12}\text{O}_{14}\text{CoK}_2$ : C 11.40, H 2.87; found: C 11.17, H 2.85. IR (KBr,  $\text{cm}^{-1}$ ): 3396(br,m), 1630(s), 1446(m), 1384(w), 1308(m), 804(m), 774(br,m), 510(m).

**2:** **1** was heated at  $120^\circ\text{C}$  for three minutes, the colour of crystal change from orange to pink thoroughly. Elemental analysis calcd (%) for  $\text{C}_4\text{O}_8\text{CoK}_2$ : C 15.34; found: C 15.12. IR (KBr,  $\text{cm}^{-1}$ ): 1659(s), 1624(s), 1427(m), 1384(w), 1338(m), 1307(w), 1284(m), 894(w), 803(m), 782(m), 520(m), 506(m).

### Physical Characterization:

Element analysis of carbon and hydrogen were performed on an Elementar Vario EL analyzer. IR spectra were recorded on a Bio-rad FTS6000 spectrometer.

X-ray diffraction data was collected on Beijing Synchrotron Radiation Facility with  $\lambda = 0.70 \text{ \AA}$  radiation (**1**) at 100K.<sup>1</sup> The structure were solved by direct method and refined by full-matrix least-square on  $F^2$  using SHELX program, with anisotropic thermal parameters for all non-hydrogen atoms. Hydrogen atoms of  $\text{H}_2\text{O}$  were located by different Fourier map and refined isotropically.<sup>2</sup> Crystallographic data of **1**:  $\text{C}_4\text{H}_{12}\text{O}_{14}\text{CoK}_2$ ,  $M_r = 421.27$ , triclinic, space group  $P\bar{1}$ ,  $a = 7.684(1) \text{ \AA}$ ,  $b = 9.011(1) \text{ \AA}$ ,  $c = 10.874(1) \text{ \AA}$ ,  $\alpha = 72.151(2)^\circ$ ,  $\beta = 70.278(2)^\circ$ ,  $\gamma = 80.430(2)^\circ$ ,  $V = 6701.0(1) \text{ \AA}^3$ ,  $Z = 2$ ,  $D_c = 2.085 \text{ g cm}^{-3}$ ,  $\mu = 1.973 \text{ mm}^{-1}$ , 5583 measured data, 3039 unique,  $R_{\text{int}} = 0.1139$ ,  $R_1 = 0.0466$  for 2281 observations of  $I \geq 2\sigma(I_0)$ ,  $wR_2 = 0.1341$  for all data, GOF = 1.004, CCDC842597. **2**:  $\text{C}_4\text{O}_8\text{CoK}_2$ ,  $M_r = 313.17$ , monoclinic, space group  $P2_1/c$ ,  $a = 8.460 \text{ \AA}$ ,  $b = 6.906 \text{ \AA}$ ,  $c = 14.657 \text{ \AA}$ ,  $\alpha = 90^\circ$ ,  $\beta = 93.11^\circ$ ,  $\gamma = 90^\circ$ ,  $V = 855.0 \text{ \AA}^3$ . It is the same as reported CCDC215207.

Thermogravimetric analysis was carried out on a Shimadzu DTG-60 analyzer at a  $10^\circ\text{C}/\text{min}$  heating rate from room-temperature to  $550^\circ\text{C}$  with Al bag.

Powder X-ray diffraction pattern was obtained on a Rigaku RINT 2000 diffractometer at room temperature with Cu K $\alpha$  radiation in a flat-plate geometry. The experiment on dehydrated sample was carried out as soon as possible in order to avoid decant in air while quality of X-ray became poor.

Magnetization measurements were performed against tightly packed polycrystalline sample in a capsule on a Quantum Design MPMS 7XL SQUID system under an applied field of 1000 Oe. Susceptibility data was corrected for diamagnetism of sample by Pascal constants ( $-169.8 \times 10^{-6} \text{ cm}^3\text{mol}^{-1}$  for **1**,  $-91.8 \times 10^{-6} \text{ cm}^3\text{mol}^{-1}$  for **2**) and background by experimental measurement on the sample holder.<sup>3</sup>

### Reference:

1. Z. Otwinowski and W. Minor, HKL2000, 1997.
2. G. M. Sheldrick, SHELX-97, University of Gottingen, Göttingen, Germany, 1997.
3. O. Kahn, Molecular Magnetism, Wiley, New York, 1993, pp. 10.

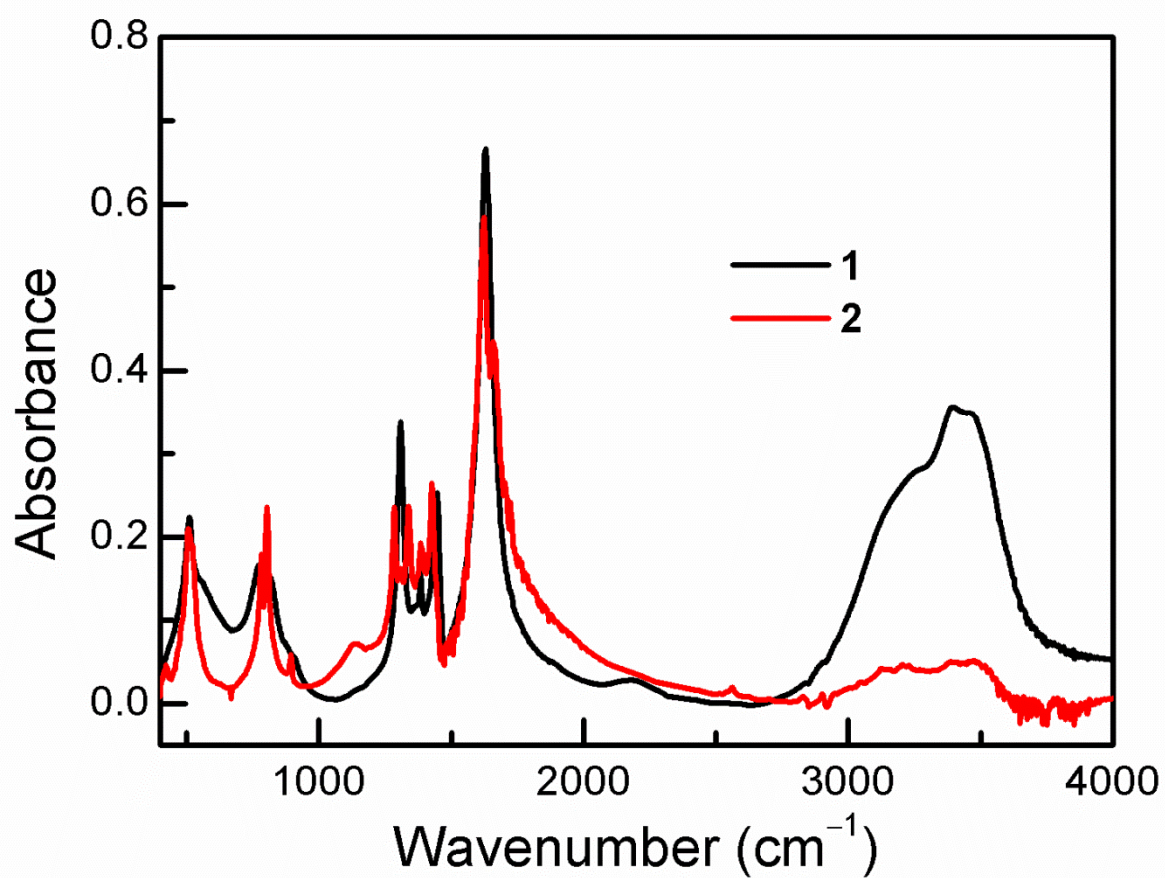

Figure S1. IR spectra of 1 and 2.

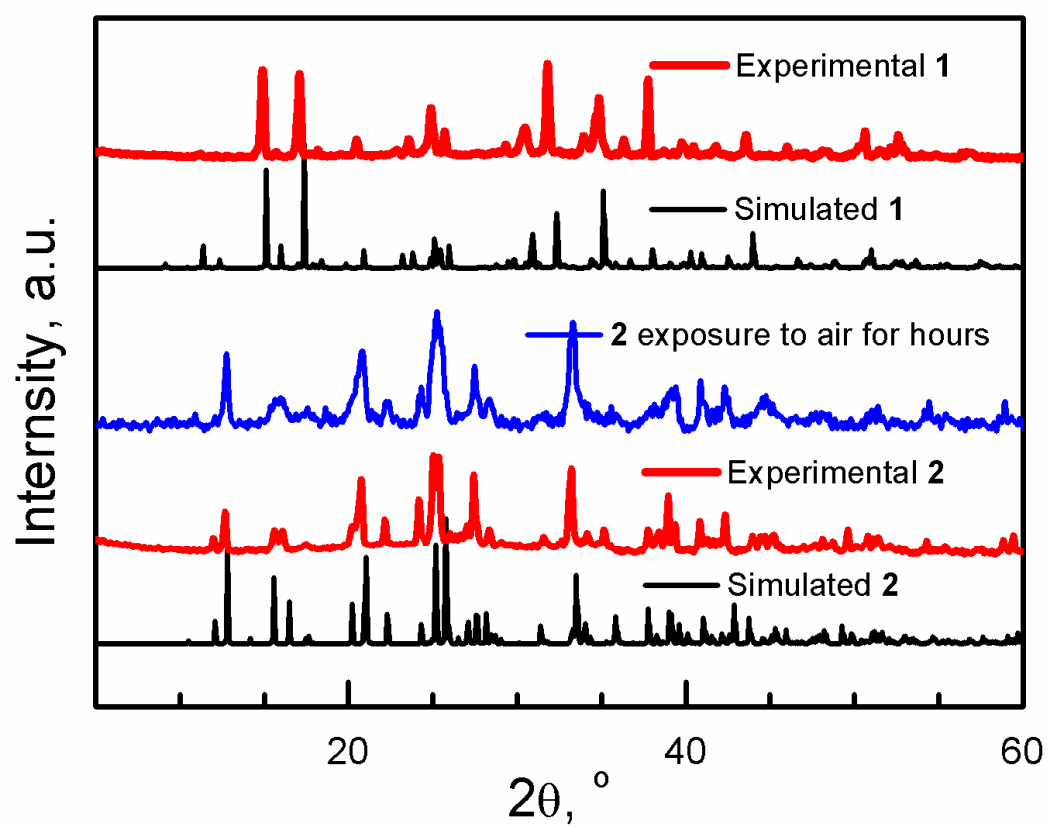

**Figure S2.** Powder X-ray diffraction patterns of 1 and 2. Blue one is dehydrated sample exposure to air for hours.
